# Supplementary material
Source: PubMed Central journal article supplement (PMC7237063)
Supplement: NIHMS1570837-supplement-sup_info.pdf [file NIHMS1570837-supplement-sup_info.pdf]

## Data Supplement S1. Supplemental material.

Figure S1. Centers for Medicare and Medicaid Services (CMS) Regional Map

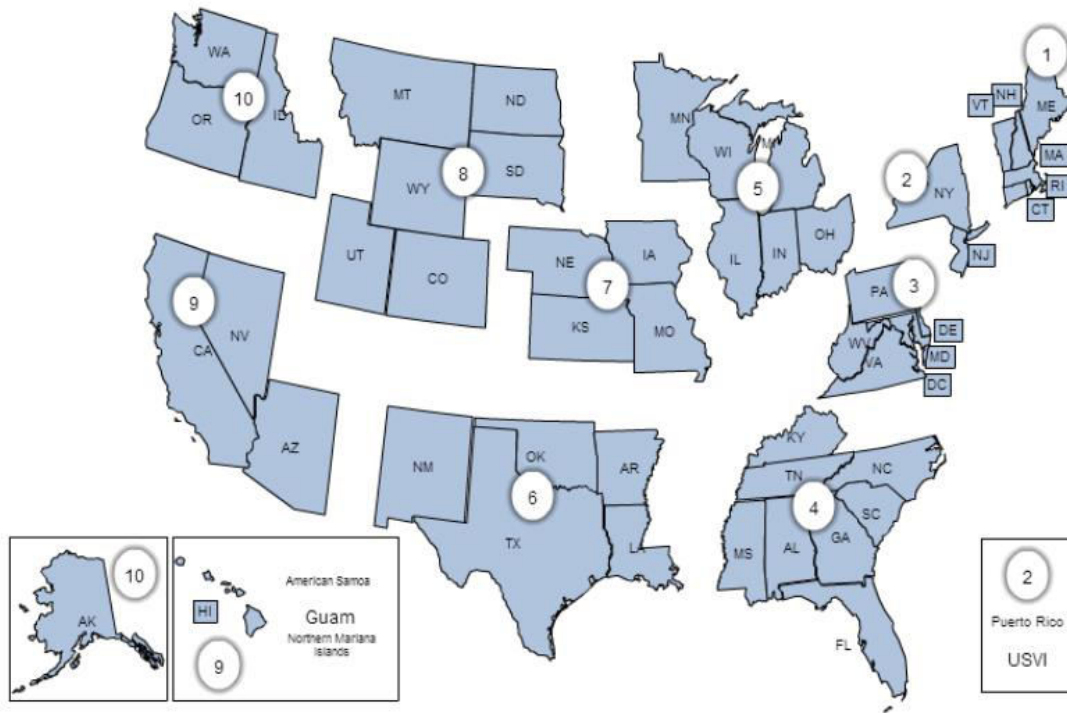

Source: Centers for Medicare and Medicaid Services. <https://www.cms.gov/About-CMS/Agency-Information/RegionalOffices/RegionalMap.html>) Accessed 11 December 2018.

| <b>Table S1. EMTALA Clinical Deficiency Tags and Summary of EMTALA Interpretive Guidelines<sup>1</sup></b>                                                                                                                                                                                                                                                                                                                                                                                         |                           |                                           |
|----------------------------------------------------------------------------------------------------------------------------------------------------------------------------------------------------------------------------------------------------------------------------------------------------------------------------------------------------------------------------------------------------------------------------------------------------------------------------------------------------|---------------------------|-------------------------------------------|
| <b>Deficiency Tag</b>                                                                                                                                                                                                                                                                                                                                                                                                                                                                              | <b>Guideline Code</b>     | <b>Description</b>                        |
| 2404                                                                                                                                                                                                                                                                                                                                                                                                                                                                                               | §489.24(j)                | Availability of On-Call Physicians        |
| 2406                                                                                                                                                                                                                                                                                                                                                                                                                                                                                               | §489.24(a);<br>§489.24(c) | Appropriate Medical Screening Examination |
| 2407                                                                                                                                                                                                                                                                                                                                                                                                                                                                                               | §489.24(d)(1,2,3)         | Stabilizing Treatment                     |
| 2409                                                                                                                                                                                                                                                                                                                                                                                                                                                                                               | §489.24 (e)(1,2)          | Appropriate Transfer                      |
| 2411                                                                                                                                                                                                                                                                                                                                                                                                                                                                                               | §489.24(f)                | Recipient Hospital Responsibilities       |
| <p>EMTALA violations involving clinical cases are forwarded to the Office of the Inspector General for review consideration for penalties; therefore this list contains EMTALA deficiency tags pertaining to clinical care. This list excludes EMTALA deficiency tags related to administrative components of the law (e.g. sign posting, maintenance of a central log). A complete list of EMTALA deficiencies may be found in Terp <i>et al</i>, <i>Annals of Emergency Medicine</i>, 2017).</p> |                           |                                           |

1. CMS Manual System Pub. 100-07 State Operations Provider Certification: Revisions to Appendix V, "Emergency Medical Treatment and Labor Act (EMTALA) Interpretive Guidelines". In: DHHS, ed.2009.
